# Supplementary material
Source: publisher site journal article supplement (https://www.dovepress.com/article/489365)
Supplement: Supplementary file 1 [file get_supplementary_file.php]

**Supplementary Table 1** Tests of Between-Subjects effects

| Source | Dependent variable | F | Sig. | Observed power n |
| --- | --- | --- | --- | --- |
| Sex | FIQ | 4.974 | .026 | .605 |
| VIQ | 2.794 | .095 | .386 |
| PIQ | 4.437 | .036 | .557 |
| Information | 6.773 | .009 | .739 |
| Similarities | 1.200 | .274 | .194 |
| Arithmetic | 2.035 | .154 | .297 |
| Vocabulary | 4.555 | .033 | .568 |
| Digit Span | 2.801 | .095 | .387 |
| Picture Completion | 2.926 | .088 | .401 |
| Picture Arrangement | .513 | .474 | .110 |
| Block Design | 21.002 | .000 | .996 |
| Object Assembly | 2.026 | .155 | .295 |
| Coding | 7.146 | .008 | .761 |
| Age | FIQ | .845 | .358 | .151 |
| VIQ | 4.051 | .044 | .520 |
| PIQ | .402 | .526 | .097 |
| Information | 4.902 | .027 | .599 |
| Similarities | 5.051 | .025 | .612 |
| Arithmetic | 1.147 | .284 | .188 |
| Vocabulary | 5.636 | .018 | .660 |
| Digit Span | 2.209 | .138 | .318 |
| Picture Completion | 3.789 | .052 | .494 |
| Picture Arrangement | 2.386 | .123 | .339 |
| Block Design | 7.315 | .007 | .771 |
| Object Assembly | 3.893 | .049 | .504 |
| Coding | .056 | .813 | .056 |

**Notes:**

**Abbreviations:** VIQ, verbal intelligence quotient; PIQ, performance intelligence quotient; FIQ, full scale intelligence quotient.

**Supplementary Table 2** the means scores of C-WISC test for different sexes

|  | Boys | girls |
| --- | --- | --- |
| FIQ | 94.34±12.77 | 91.55±12.29 |
| PIQ | 96.11±13.74 | 93.43±13.42 |
| VIQ | 94.09±13.92 | 91.82±12.87 |
| Information | 8.56±3.06 | 7.94±2.76 |
| Vocabulary | 8.54±3.00 | 7.88±2.91 |
| Block design | 10.67±3.26 | 9.18±3.04 |
| Code | 9.00±2.99 | 9.81±3.09 |

**Notes:**

**Abbreviations:** C-WISC, The Chinese version of the Wechsler Intelligence Scale for school-age Children, 3rd Edition; FIQ, full scale intelligence quotient; PIQ, performance intelligence quotient; VIQ, verbal intelligence quotient.

**Supplementary Table 3** the means scores of C-WISC test for different ages

|  | Senior group | Junior group |
| --- | --- | --- |
| VIQ | 92.17±15.03 | 94.47±13.02 |
| PIQ | 96.29±13.43 | 95.35±13.88 |
| FIQ | 93.16±12.96 | 94.24±12.61 |
| Block design | 10.92±3.24 | 10.15±3.26 |
| Object assembly | 11.43±3.18 | 10.81±3.33 |
| Information | 8.08±3.23 | 8.64±2.90 |
| Similarities | 9.80±2.95 | 10.31±2.98 |
| Vocabulary | 8.11±3.16 | 8.58±2.89 |

**Notes:**

**Abbreviations:** C-WISC, The Chinese version of the Wechsler Intelligence Scale for school-age Children, 3rd Edition; VIQ, verbal intelligence quotient; PIQ, performance intelligence quotient; FIQ, full scale intelligence quotient.
